# Supplementary material for: Origin of active transport in breast-cancer cells
Source: Royal Society of Chemistry journal article supplement (doi:10.1039/c3sm50172h), 2013-01-01
Supplement: c3sm50172h.pdf [file c3sm50172h.pdf]

## Supplementary material

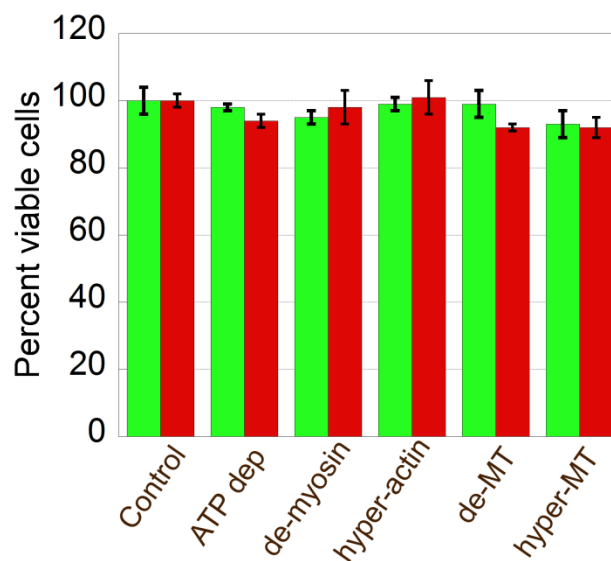

**Figure S1.** Relative viability of low MP (green bar) and high MP (red bar) cells 6 hours after treatments. Alamar Blue (BUF012A, AbD Serotec-MorphoSys, Germany) stain for metabolic activity was used as an indicator for cell viability (n=9).

**Fluorescent staining and imaging.** We have stained the actin, MTs, and nuclei of fixated cells. Cells were fixated with 3.2% Paraformaldehyde (PFA, Electron Microscopy Sciences, Hatfield, PA) in PBS for 20 minutes at 4°C, then permeabilized with 0.5% Triton X-100 (A.R., Bio Lab, Israel) for 5 minutes at room temperature, and blocked with 3% FBS for 10 minutes at room temperature. F-actin and  $\alpha$ -tubulin were stained with a mixture of phalloidin-FITC (20  $\mu$ g/ml, Sigma, St. Louis, MO) and mouse anti- $\alpha$ -tubulin monoclonal antibody (clone DM1A, 1.1  $\mu$ g/ml, Sigma, St. Louis, MO), respectively. The nuclei were stained with 4'-6-diamidino-2-phenylindole (DAPI, Sigma, St. Louis, MO) in parallel with MT secondary cy3-labeled goat anti-mouse IgG antibody (Jackson Immuno Research, West Grove, PA). Slides were stabilized with Fluoromount G (Southern Biotech, Birmingham, AL) according to manufacturer protocol. The specimens were imaged with a spectral-imaging Zeiss LSM700 confocal system, mounted on a motorized Axio Observer Z1 microscope, using an x63/1.4 NA oil objective.

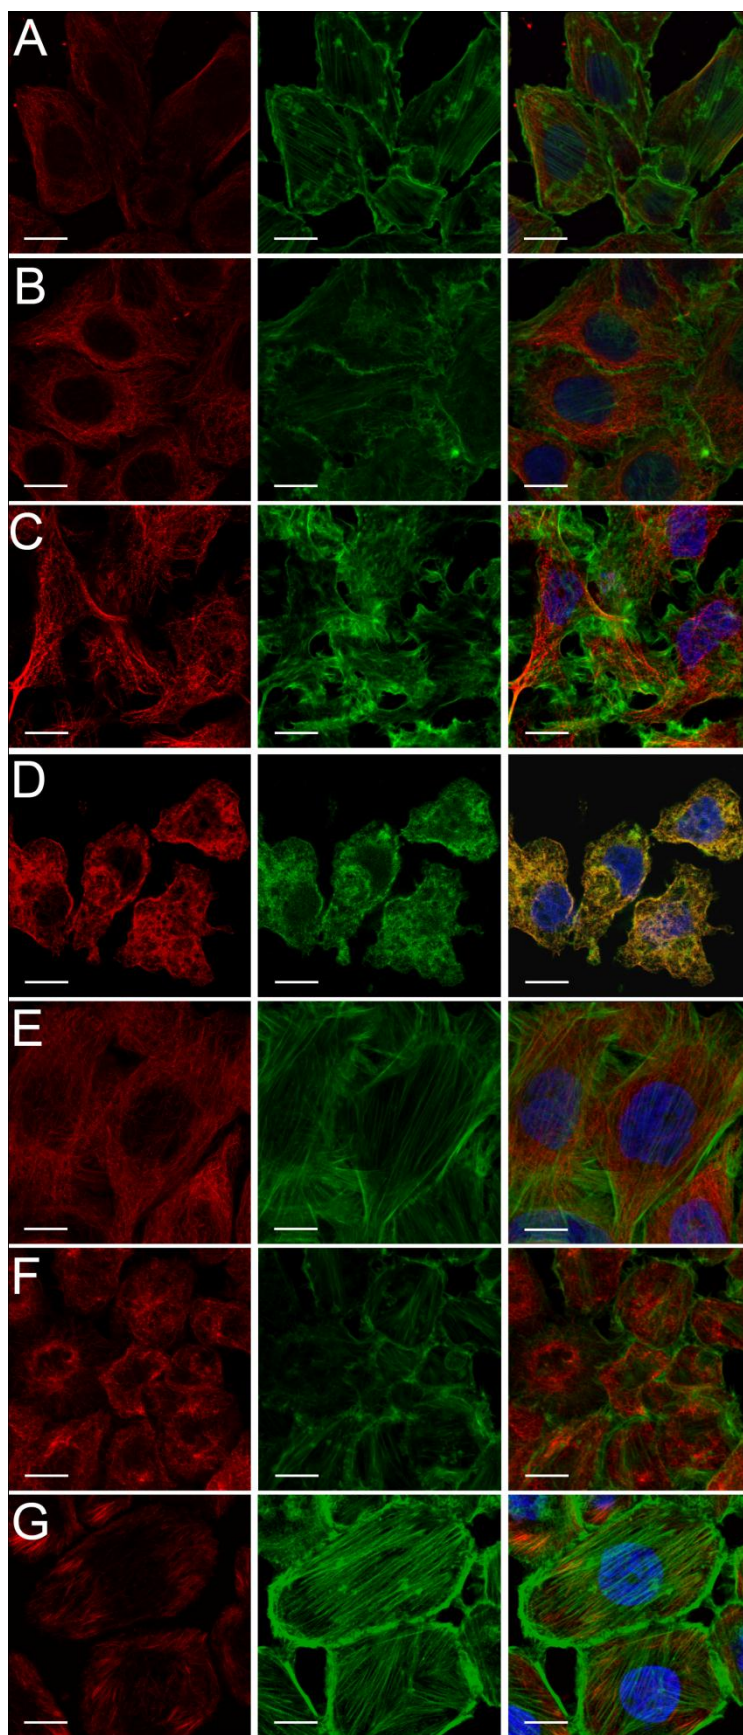

**Figure S2.** Cytoskeleton structure of low MP cells. (left) Microtubules, (mid) actin, (right) merge with nucleus. (A) control; (B) ATP dep; (C) de-myosin; note blebbing phenomenon occurring in the cells, where only actin is in the blebs. (D) de-actin; (E) hyper-actin; (F) de-MT; (G) hyper-MT. Scale bars are 10  $\mu\text{m}$

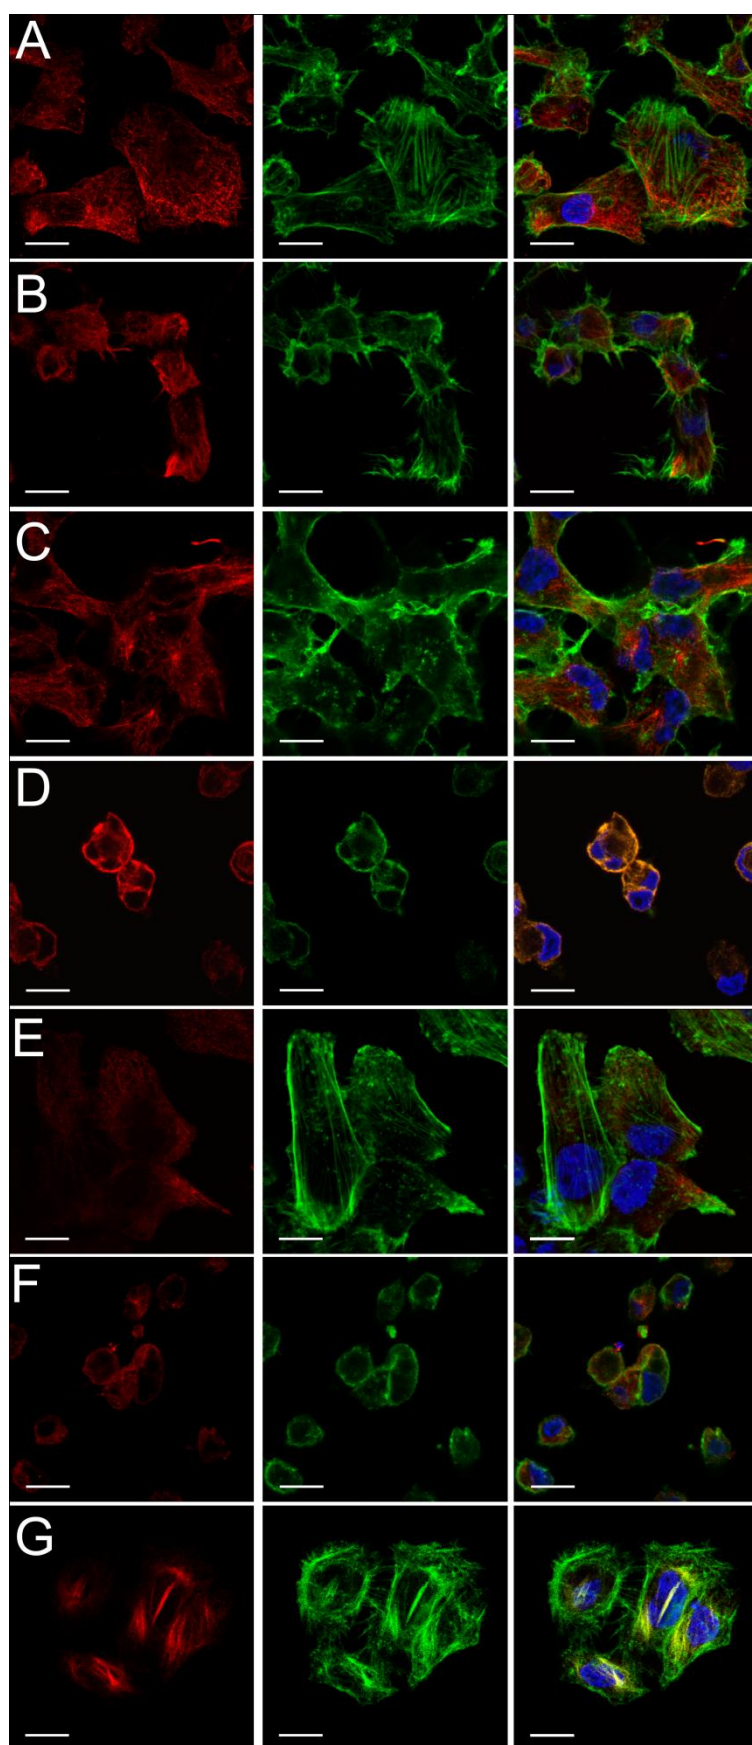

**Figure S3.** Cytoskeleton structure of high MP cells. (left) Microtubules, (mid) actin, (right) merge with nucleus. (A) control; (B) ATP dep; (C) de-myosin; (D) de-actin; (E) hyper-actin; (F) de-MT; (G) hyper-MT. Scale bars are 10  $\mu\text{m}$

**Table S1.** Scaling parameters of the categorized, ensemble-averaged MSD fit to  $\langle \Delta r^2(\tau) \rangle = A \tau^\alpha$  at different timescales<sup>a</sup>

| <b><math>\tau &lt; 0.1</math> sec</b> |                             |                      |                                                               |                      |
|---------------------------------------|-----------------------------|----------------------|---------------------------------------------------------------|----------------------|
|                                       | <b>MSD scaling exponent</b> |                      | <b>MSD pre-factor (<math>\mu\text{m}^2/\text{sec}</math>)</b> |                      |
|                                       | <b>Low MP cells</b>         | <b>High MP cells</b> | <b>Low MP cells</b>                                           | <b>High MP cells</b> |
| <b>Control</b>                        | 1.18                        | 1.30                 | $5.4 \times 10^{-3}$                                          | $1.7 \times 10^{-2}$ |
| <b>ATP dep</b>                        | 0.61                        | 0.97                 | $1.1 \times 10^{-3}$                                          | $0.5 \times 10^{-2}$ |
| <b>De-myosin</b>                      | 1.23                        | 1.31                 | $7.3 \times 10^{-3}$                                          | $2.2 \times 10^{-2}$ |
| <b>De-actin</b>                       | 1.14                        | 1.23                 | $7.3 \times 10^{-3}$                                          | $1.7 \times 10^{-2}$ |
| <b>Hyper-actin</b>                    | 1.23                        | 1.31                 | $6.0 \times 10^{-3}$                                          | $1.5 \times 10^{-2}$ |
| <b>De-MT</b>                          | 1.14                        | 1.26                 | $4.5 \times 10^{-3}$                                          | $2.2 \times 10^{-2}$ |
| <b>Hyper-MT</b>                       | 1.20                        | 1.18                 | $3.8 \times 10^{-3}$                                          | $0.7 \times 10^{-2}$ |

  

| <b><math>0.2 \text{ sec} &lt; \tau &lt; 2 \text{ sec}</math></b> |                             |                      |                                                               |                      |
|------------------------------------------------------------------|-----------------------------|----------------------|---------------------------------------------------------------|----------------------|
|                                                                  | <b>MSD scaling exponent</b> |                      | <b>MSD pre-factor (<math>\mu\text{m}^2/\text{sec}</math>)</b> |                      |
|                                                                  | <b>Low MP cells</b>         | <b>High MP cells</b> | <b>Low MP cells</b>                                           | <b>High MP cells</b> |
| <b>Control</b>                                                   | 1.32                        | 1.38                 | $7.5 \times 10^{-3}$                                          | $2.1 \times 10^{-2}$ |
| <b>ATP dep</b>                                                   | 0.68                        | 1.17                 | $1.1 \times 10^{-3}$                                          | $0.7 \times 10^{-2}$ |
| <b>De-myosin</b>                                                 | 1.36                        | 1.35                 | $10.0 \times 10^{-3}$                                         | $2.7 \times 10^{-2}$ |
| <b>De-actin</b>                                                  | 1.32                        | 1.29                 | $10.0 \times 10^{-3}$                                         | $2.1 \times 10^{-2}$ |
| <b>Hyper-actin</b>                                               | 1.36                        | 1.34                 | $8.3 \times 10^{-3}$                                          | $1.8 \times 10^{-2}$ |
| <b>De-MT</b>                                                     | 1.30                        | 1.49                 | $6.1 \times 10^{-3}$                                          | $3.9 \times 10^{-2}$ |
| <b>Hyper-MT</b>                                                  | 1.22                        | 1.52                 | $3.8 \times 10^{-3}$                                          | $1.5 \times 10^{-2}$ |

  

| <b><math>\tau &gt; 3 \text{ sec}</math></b> |                             |                      |                                                               |                      |
|---------------------------------------------|-----------------------------|----------------------|---------------------------------------------------------------|----------------------|
|                                             | <b>MSD scaling exponent</b> |                      | <b>MSD pre-factor (<math>\mu\text{m}^2/\text{sec}</math>)</b> |                      |
|                                             | <b>Low MP cells</b>         | <b>High MP cells</b> | <b>Low MP cells</b>                                           | <b>High MP cells</b> |
| <b>Control</b>                              | 0.80                        | 0.77                 | $12.0 \times 10^{-3}$                                         | $3.3 \times 10^{-2}$ |
| <b>ATP dep</b>                              | 0.92                        | 0.80                 | $0.8 \times 10^{-3}$                                          | $1.0 \times 10^{-2}$ |
| <b>De-myosin</b>                            | 0.83                        | 0.98                 | $16.0 \times 10^{-3}$                                         | $3.3 \times 10^{-2}$ |
| <b>De-actin</b>                             | 1.01                        | 0.91                 | $13.0 \times 10^{-3}$                                         | $2.6 \times 10^{-2}$ |
| <b>Hyper-actin</b>                          | 0.83                        | 0.90                 | $13.0 \times 10^{-3}$                                         | $2.3 \times 10^{-2}$ |
| <b>De-MT</b>                                | 0.88                        | 1.0                  | $8.6 \times 10^{-3}$                                          | $5.0 \times 10^{-2}$ |
| <b>Hyper-MT</b>                             | 0.88                        | 1.1                  | $5.1 \times 10^{-3}$                                          | $2.1 \times 10^{-2}$ |

<sup>a</sup> Fits were weighted towards shorter lag-times where data is more statistically reliable

**Table S2.** Fits of the scaling exponents of the displacements for powers  $0 \leq q \leq 8$

| <b>Low MP cells</b> |                           |                   |                        |
|---------------------|---------------------------|-------------------|------------------------|
|                     | <b>Lower powers</b>       | <b>Intercept</b>  | <b>Higher powers</b>   |
| <b>Control</b>      | $\lambda(q)=0.65q-0.002$  | 2                 | $\lambda(q)=0.73q-0.1$ |
| <b>ATP dep</b>      | $\lambda(q)=0.31q-0.0003$ | 1.75 <sup>a</sup> | $\lambda(q)=0.4q-0.1$  |
| <b>De-myosin</b>    | $\lambda(q)=0.66q-0.003$  | 2                 | $\lambda(q)=0.76q-0.2$ |
| <b>De-actin</b>     | $\lambda(q)=0.64q+0.001$  | 3.5               | $\lambda(q)=0.99q-1.2$ |
| <b>Hyper-actin</b>  | $\lambda(q)=0.64q-0.001$  | 1.5               | $\lambda(q)=0.75q-0.2$ |
| <b>De-MT</b>        | $\lambda(q)=0.63q-0.004$  |                   |                        |
| <b>Hyper-MT</b>     | $\lambda(q)=0.61q-0.002$  |                   |                        |

  

| <b>High MP cells</b> |                                       |                  |                                     |
|----------------------|---------------------------------------|------------------|-------------------------------------|
|                      | <b>Lower powers</b>                   | <b>Intercept</b> | <b>Higher powers</b>                |
| <b>Control</b>       | $\lambda(q)=0.68q-0.002$              | 2                | $\lambda(q)=0.77q-0.2$ <sup>b</sup> |
| <b>ATP dep</b>       | $\lambda(q)=0.52q-0.003$              | 1.5              | $\lambda(q)=0.72q-0.2$ <sup>b</sup> |
| <b>De-myosin</b>     | $\lambda(q)=0.69q-0.001$              | 2                | $\lambda(q)=0.78q-0.2$              |
| <b>De-actin</b>      | $\lambda(q)=0.65q+0.001$              | 2                | $\lambda(q)=0.72q-0.1$              |
| <b>Hyper-actin</b>   | $\lambda(q)=0.67q-0.001$              | 2                | $\lambda(q)=0.82q-0.3$              |
| <b>De-MT</b>         | $\lambda(q)=0.79q-0.003$ <sup>c</sup> |                  |                                     |
| <b>Hyper-MT</b>      | $\lambda(q)=0.74q-0.003$              | 2                | $\lambda(q)=0.86q-0.2$              |

<sup>a</sup> crossover does not indicate any of the 4 described cases, as basic motion is sub-diffusive

<sup>b</sup> fit up to  $q = 6$

<sup>c</sup> fit up to  $q = 7$
